# Supplementary material for: Examining nutrition strategies to influence DNA methylation and epigenetic clocks: a systematic review of clinical trials
Source: Front Aging. 2024 Jul 15;5:1417625. doi: 10.3389/fragi.2024.1417625 (PMC11284312; doi:10.3389/fragi.2024.1417625)
Supplement: Supplementary file 1 [file Table1.xlsx]

## Sheet: Sheet1
Reference	Objectives	Study design	Crossover?	Participant-blinded	Observer-blinded	Control condition	Name of the trial or research centre, and country	Intervention time	n	Age: mean	% Females	Nutrition intervention	Dietary supplements	Other interventions administered together	Epigenetic markers	Tissue type	Are epigenetics a primary outcome? Y, N	Statistical analysis	Results
Chan D, McGraw S, Klein K, Wallock LM, Konermann C, Plass C, Chan P, Robaire B, Jacob RA, Greenwood CM, Trasler JM. Stability of the human sperm DNA methylome to folic acid fortification and short-term supplementation. Hum Reprod. 2017 Feb;32(2):272-283.	To evaluate whether short-term and long-term exposures to low-dose folic acid supplementation alter DNA methylation in sperm	Randomized, double-blinded, placebo-controlled trial	N	Y	Y	Placebo containing the vehicle used to prepare the supplements	San Francisco bay area, US	3 months	8	18-32 years	0		multivitamin: vitamin C (272 mg/d), vitamin E (31 mg/d), and folic acid (400 mug/d)		Array-based DNA methylation from 540K sites	Sperm	Y	Paired t-tests	No significant changes in sperm DNA methylation were found after the multivitamin supplementation
Chen L, Dong Y, Bhagatwala J, Raed A, Huang Y, Zhu H. Effects of Vitamin D3 Supplementation on Epigenetic Aging in Overweight and Obese African Americans With Suboptimal Vitamin D Status: A Randomized Clinical Trial. J Gerontol A Biol Sci Med Sci. 2019 Jan 1;74(1):91-98. doi: 10.1093/gerona/gly223.	To test the hypothesis that vitamin D supplementation slows down epigenetic aging in participants with suboptimal levels of vitamin D	Randomized clinical trial with four conditions: placebo, and 3 groups of vitamin D intervention: 600 IU/d, 2000 lU/d, 4000 lU/d	N	Y	Y	Placebo	Georgia, US	16 weeks	51	26	84		Vitamin D supplementation		Horvarth DNAm age Horvarth age acceleration index Hannum DNAm age Hannum age acceleration index	Blood	Y	Paired t-test Mixed effects regression models for repeated measures	In the intervention groups of 2000 lU/d and 4000 lU/d, Horvath age was decreased by 1.83 and 1.62 years regarding baseline, respectively Changes in Hannum age were not significant Increases in serum 25(OH)D concentrations were associated with decreases in Horvath age. There wa no association between Hannum clock and changes in serum 25(OH)D
Crider KS, Quinlivan EP, Berry RJ, Hao L, Li Z, Maneval D, Yang TP, Rasmussen SA, Yang Q, Zhu JH, Hu DJ, Bailey LB. Genomic DNA methylation changes in response to folic acid supplementation in a population-based intervention study among women of reproductive age. PLoS One. 2011;6(12):e28144.	To determine what global DNA methylation changes accompany folic acid supplementation and withdrawal, and if the changes are time-, dose-, or genotype- dependent	Randomized cross-over	Y	N	N		Xianghe County, Hebei Province, China	6 months	Sample with uncoagulated blood: n=76 Sample with coagulated blood: n=135	30.4	100		Folic acid supplements (100 mug/d, 400 mug/d, or 4000 mug/d)		% of 5-methyldeoxycytidine (%MdCyt), as extracted from uncoagulated blood and from coagulated blood	Blood	Y	general linear model for repeated measures	Uncoagulated blood: %MdCyt methylation did not significantly change after folic acid supplementation Coagulated blood: %MdCyt methylation was reduced after 6 months of folic acid supplementation.
Demidenko O, Barardo D, Budovskii V, Finnemore R, Palmer FR, Kennedy BK, Budovskaya YV. Rejuvant®, a potential life-extending compound formulation with alpha-ketoglutarate and vitamins, conferred an average 8 year reduction in biological aging, after an average of 7 months of use, in the TruAge DNA methylation test. Aging (Albany NY). 2021 Nov 30;13(22):24485-24499.	To examine the associations between taking Rejuventant (R) on human biological aging	Non-randomized	N	N	N			4 to 10 months	42	63	33.3		Rejuventant (R), a compound containing calcium-alpha-ketoglutarate (1g/d), vitamin A (men's formulation) and vitamin D (women's formulation)		proprietary algorithm based on DNA methylation (undisclosed) The correlation between chronological age and TruMe Age was moderate-high (r=0.77)	Blood		Paired t-test	Treatment with Rejuvant (R) decreased biological age by approximately 8 years The effects were similar for males and females
Fiorito G, Caini S, Palli D, Bendinelli B, Saieva C, Ermini I, Valentini V, Assedi M, Rizzolo P, Ambrogetti D, Ottini L, Masala G. DNA methylation-based biomarkers of aging were slowed down in a two-year diet and physical activity intervention trial: the DAMA study. Aging Cell. 2021 Oct;20(10):e13439.	To investigate whether modifying dietary habits and increasing physical activity have favorable effects on biological aging, measured both using the DNAmGrimAge and the stochastic epigenetic mutations index (SEMs)	Single-center, randomized intervention, 4 arms (diet vs. physical activity vs. diet+physical activity vs. none)	N	N	N	No intervention	Diet, Physical Activity, and Mamography (DAMA) study, Italy	2 years	219	59	100	Women were counseled to adopt a diet with the following components: plant-based foods, low glycemic load, low in saturated and trans-fats, low in alcohol, rich in antioxidants No advice was given about the total calories/total amount of food Intervention objectives: - Replacement of refined grains with whole grains; - Consumption of >= 1 portion of raw vegetables and 1 portion of cooked vegetable…		Physical activity (independent arm)< increase moderate PA to 1h/day, + once/w hour with trained PA experts at a fitness facility	GrimAge DNAm Stochastic Epigenetic Mutations	Blood	Y	Linear regression models with delta changes in methylation as dependent variable	The dietary intervention group led to a reduction in delta acceleration of GrimAge compared to the control group There was no difference in delta scores for stochastic epigenetic mutations
Frankhouser DE, Steck S, Sovic MG, Belury MA, Wang Q, Clinton SK, Bundschuh R, Yan PS, Yee LD. Dietary omega-3 fatty acid intake impacts peripheral blood DNA methylation -anti-inflammatory effects and individual variability in a pilot study. J Nutr Biochem. 2022 Jan;99:108839.	To examine the impact of omega-3 PUFAs on methylation	Non-randomized Secondary analysis in which they analyze 10 participants with best response to one of the 4 dosages of omega-3 PUFAS administered as part of a larger randomized, placebo-controlled study	N	NA	NA		Ohio State University, US	6 months	10	51	100		Omega-3 PUFAS (5.04 of EPA + DHA)		Global DNA methylation	Blood	Y	Paired-sample t-test	There was no change in global DNA methylation after treatment with omega-3 PUFAs supplementation
Gensous N, Garagnani P, Santoro A, Giuliani C, Ostan R, Fabbri C, Milazzo M, Gentilini D, di Blasio AM, Pietruszka B, Madej D, Bialecka-Debek A, Brzozowska A, Franceschi C, Bacalini MG. One-year Mediterranean diet promotes epigenetic rejuvenation with country- and sex-specific effects: a pilot study from the NU-AGE project. Geroscience. 2020 Apr;42(2):687-701.	To evaluate the impact of a one-year Mediterranean-like diet on epigenetic markers of age	Non-randomized Subsample drawn from a randomized control trial (only from the intervention group)	N	N	N	No control	NU-AGE study (Italy and Poland)	1 year	120	72	58	Mediterranean diet			Epigenetic age (Horvarth DNAmAge clock)	Blood	Y	Paired sample t-test (to compare epigenetic age before and after the intervention) Pearson correlation between epigenetic age and adherence of Mediterranean diet	In the Italian subcohort: no differences between timepoints in epigenetic age acceleration, intrinsic epigenetic age acceleration was lower at T1 versus at baseline, while extrinsic epigenetic age acceleration showed no differences between timepoints In the Polish subcohort: measures of age acceleration were lower at T1 versus at baseline, intrinsic epigenetic age acceleration was lower at T1 ver…
Hübner U, Geisel J, Kirsch SH, Kruse V, Bodis M, Klein C, Herrmann W, Obeid R. Effect of 1 year B and D vitamin supplementation on LINE-1 repetitive element methylation in older subjects. Clin Chem Lab Med. 2013 Mar 1;51(3):649-55.	To study the effects of vitamin D + Ca + B vitamins vs. vitamin D + Ca on epigenetic markers and biological age	Randomized, double blind, controlled	N	Y	Y	Supplement (D + Ca) without B-complex	Saarland University Hospital, Germany	1 year	50	68.4	70.6		Supplement 1: 1200 lE vitamin D3 + 800 mg Ca-carbonate Supplement 2: supplement 1 + 0.5 mg folic acid + 50mg pyridoxine Hcl + 0.5 mg cyanocobalamin		LINE-1 methylation		Y	Paired-sample t-test	Mean LINE-1 methylation did not significantly change before or after supplementation
Hunter DJ, James L, Hussey B, Wadley AJ, Lindley MR, Mastana SS. Impact of aerobic exercise and fatty acid supplementation on global and gene-specific DNA methylation. Epigenetics.	To investigate the impact of acute aerobic exercise and the supplementation of omega-3 polyunsaturated fatty acids and extra virgin olive oil on global DNA methylation	Randomized, double-blind, cross-over desing with a 4 weeks washout (condition 1: exercise + omega-3 PUFAS; condition 2: exercise + extra virgin olive oil supplement)	Y	Y	Y		Loughborough University, UK	4 weeks	8	39.5	0		Omega-3 polyunsaturated fatty acids (5.7 g/d) Extra virgin olive oil (capsule format, 6g/d)		Global methylation	Blood	Y	Repeated-measures ANOVA	Supplementation with fatty acids (i.e., omega-3 or extra virgin olive oil) did not alter global methylation
Jenkins T, Aston K, Carrell D, DeVilbiss E, Sjaarda L, Perkins N, Mills JL, Chen Z, Sparks A, Clemons T, Chaney K, Peterson CM, Emery B, Hotaling J, Johnstone E, Schisterman E, Mumford SL. The impact of zinc and folic acid supplementation on sperm DNA methylation: results from the folic acid and zinc supplementation randomized clinical trial (FAZST). Fertil Steril. 2022 Jan;117(1):75-85	To determine if a 6-months folic acid and zinc supplementation impacts sperm DNA methylation patterns	Multi-centered, double-blind, randomized, placebo-controlled trial	N	Y	Y	Placebo	The Folic Acid and Zinc Supplementation (FAZST), US	6 months	1470	32.6	0		Zinc and folic acid (zinc: 30 mg/d, folic acid 5mg/d)		Global sperm DNA methylation Germline age estimation calculated from DNA methylation	Sperm	Y	Two-tailed t test in each group corrected for Bonferroni	There was no effect of zinc + folic acid supplementation on global DNA methylation or on germline age estimation
Jung AY, Smulders Y, Verhoef P, Kok FJ, Blom H, Kok RM, Kampman E, Durga J. No effect of folic acid supplementation on global DNA methylation in men and women with moderately elevated homocysteine. PLoS One. 2011;6(9):e24976.	To examine whether long-term daily supplementation with folic acid increases global DNA methylation compared with placebo in participants with elevated plasma homocysteine	Randomized, double-blinded, placebo-controlled trial	N	Y	Y	Placebo capsules, identical in appearance	Folic Acid and Carotid Intima Media Thickness (FACIT) trial, the Netherlands	3 years	216	61	45		Folic acid (800 mug/d)		Global DNA methylation	Blood	Y	ANOVA test	There was no difference in DNA methylation between placebo and treament with folic acid No effect was observed when stratifying the sample by age or gender
Michels KB, Binder AM. Impact of folic acid supplementation on the epigenetic profile in healthy unfortified individuals - a randomized intervention trial. Epigenetics. 2024 Dec;19(1):2293410.	To test the influence of folic acid supplementation on DNA methylation	Randomized clinical trial with two conditions: supplementation of 400 mug/d of folic acid vs. 800 mug/d	N	Unclear	Unclear		University of Freiburg, Germany	8 weeks	16	39.22	0		Folic acid (400 mug/d vs. 800 mug/d)		Epigenetic clocks: Horvarth DNAm age Hannum DNAm age PhenoAge GrimAge GrimAge2 DunedinPACE	Blood	Y	Linear mixed models	No changes in epigenetic clocks resulting from folic acid supplementation were observed
Ostojic SM, Mojsin M, Drid P, Vranes M. Does Dietary Provision of Guanidinoacetic Acid Induce Global DNA Hypomethylation in Healthy Men and Women? Lifestyle Genom. 2018;11(1):16-18.	To evaluate whether guanidinoacetic acid supplements affect DNA methylation	Non-randomized	N	NA	NA		Univesity of Novi Sad, Serbia	12 weeks	14	22.2	57		Guanidinoacetic acid (3g/d)		Global DNA methylation	Blood	Y	Paired t-tests	Dietary supplementation with guanidinoacetic acid did not have an effect on global DNA methylation
Perfilyev A, Dahlman I, Gillberg L, Rosqvist F, Iggman D, Volkov P, Nilsson E, Risérus U, Ling C. Impact of polyunsaturated and saturated fat overfeeding on the DNA-methylation pattern in human adipose tissue: a randomized controlled trial. Am J Clin Nutr. 2017 Apr;105(4):991-1000.	To investigate whether the epigenome of human adipose tissue is affected differently by dietary fat composition and general overfeeding in a randomized trial	Randomized, double-blind	N	Y	Y		LIPOGAIN cohort, Sweden	7 weeks	31		36	Refined palm oil added to muffins vs Refined sunflower oil added to muffins			Global DNA methylation	Adipose tissue	Y	Wilcoxon's paired t test Generalized estimating equations	Mean degree of methylation in the adipose tissue was significantly increased by both the diet with palm oil and the diet with sunflower oil
Sae-Lee C, Corsi S, Barrow TM, Kuhnle GGC, Bollati V, Mathers JC, Byun HM. Dietary Intervention Modifies DNA Methylation Age Assessed by the Epigenetic Clock. Mol Nutr Food Res. 2018 Dec;62(23):e1800092. Study 1: MOF, Monomeric and oligomeric flavonols	To examine changes in DNA methylation patterns due to dietary interventions	Non-randomized Secondary analysis from a double-blind, randomized, placebo-controlled study. Participants from the current study were selected among those participants in the intervention condition	N	NA	NA		Undescribed	8 weeks	13	30-60	0		monomeric and oligomeric flavonols (MOF, 200 mug/d) from grape seeds		Global methylation Horvath mAge clock	Blood	N	Paired-sample t-test	Global DNA methylation was not significantly changed after MOF supplementation mAge did not significantly change following the intervention
Sae-Lee C, Corsi S, Barrow TM, Kuhnle GGC, Bollati V, Mathers JC, Byun HM. Dietary Intervention Modifies DNA Methylation Age Assessed by the Epigenetic Clock. Mol Nutr Food Res. 2018 Dec;62(23):e1800092. Study 2: Folic acid + vitamin B12	To examine changes in DNA methylation patterns due to dietary interventions	Randomized, double-blinded, placebo-controlled trial	N	Y	Y	Placebo	Undescribed	2 years	44	65-75	57		folic acid (400 mug/d) vitamin B12 (500 mug/d)		Global methylation Horvath mAge clock	Blood	Y	ANOVA test	Folic acid + vitamin B12 supplementation increased global DNA methylation mAge did not significantly change following the intervention The influence of gender was not statistically significant
Salas-Huetos A, James ER, Salas-Salvadó J, Bulló M, Aston KI, Carrell DT, Jenkins TG. Sperm DNA methylation changes after short-term nut supplementation in healthy men consuming a Western-style diet. Andrology. 2021 Jan;9(1):260-268.	To evaluate the effect of tree nut consumption on sperm DNA methylation patterns in healthy individuals reporting eating a Western-style diet	Non-randomized Post-hoc analysis selecting participants who completed a randomized-controlled, parallel trial	N	N	N	Western diet without nuts	FERTINUTS, Spain	14 weeks	72	25	0	Western diet with 60g/d of nuts			Global methylation SIte-specific methylation analysis	Sperm	Y	Paired t-tests corrected with FDR	Global methylation changes were not significantly different between study groups, Site-specific DNA methylation analysis revealed no significantly differentially CpGs associated with nut intervention In the nut intervention group, there were 36 genomic regions that were significantly differentially methylated between the baseline and the post-intervention phase, 97% of whom were hypermethylation …
Scoccianti C, Ricceri F, Ferrari P, Cuenin C, Sacerdote C, Polidoro S, Jenab M, Hainaut P, Vineis P, Herceg Z. Methylation patterns in sentinel genes in peripheral blood cells of heavy smokers: Influence of cruciferous vegetables in an intervention study. Epigenetics. 2011 Sep 1;6(9):1114-9.	To investigate the effects of three dietary regimes to modify DNA methylation patterns in peripheral white blood cells of heavy smokers	Randomized	N	N	Y	Normal diet: isocaloric diet with balanced fruits and vegetables	Torino, Italy	4 weeks	88	52	0	"Normal" diet: isocaloric diet with balanced fruits and vegetables "Enriched diet": diet that included flavonoids and isothiocyanates-rich foods, such as cruciferous vegetables "Supplemented diet": normal diet + flavonoids, specially green tea and soy products			LINE-1 methylation	Blood	Y	Wilcoxon signed rank test	The three diets were associated with small increases in LINE-1 methylation changes. The study did not compare these differences in methylation across diets
Worthley DL, Le Leu RK, Whitehall VL, Conlon M, Christophersen C, Belobrajdic D, Mallitt KA, Hu Y, Irahara N, Ogino S, Leggett BA, Young GP. A human, double-blind, placebo-controlled, crossover trial of prebiotic, probiotic, and synbiotic supplementation: effects on luminal, inflammatory, epigenetic, and epithelial biomarkers of colorectal cancer. Am J Clin Nutr. 2009 Sep;90(3):578-86.	To establish the relative luminal, epithelial, and epigenetic consequences of prebiotic, probiotic, and synbiotic dietary supplementation in humans	Randomized, double-blinded, placebo-controlled trial	Y	Y	Y	Placebo: probiotic condition (one capsule containing 5g of sucrose) Placebo: starch condition (one sachet containing 25g of digestable maize cornstarch)	Brisbane, Australia	4 weeks	20	60.4	35		Prebiotic: high-amylose maize starch (one sachet containing 25g/d) Probiotic: Bifidobacterium lactis (one capsule containing 5g/d)		LINE-1 methylation		N	Mixed-model analysis of variance	LINE-1 methylation did not change significantly with the dietary interventions
Yaskolka Meir A, Keller M, Bernhart SH, Rinott E, Tsaban G, Zelicha H, Kaplan A, Schwarzfuchs D, Shelef I, Gepner Y, Li J, Lin Y, Blüher M, Ceglarek U, Stumvoll M, Stadler PF, Stampfer MJ, Kovacs P, Liang L, Shai I. Lifestyle weight-loss intervention may attenuate methylation aging: the CENTRAL MRI randomized controlled trial. Clin Epigenetics. 2021 Mar 4;13(1):48.	To explore whether a lifestyle intervention can lead to epigenetic changes in participants with obesity and/or dislipidemia	Non-randomized Secondary analysis of the CENTRAL trial (a randomized clinical trial in which participants are assigned to 4 groups: low fat diet (with and without physical activity) and Mediterranean/low carbohydrate diet (with and without physical activity).	N	N	Unclear		CENTRAL, Israel	18 months	120	49	8	Mediterranean diet + low carbohydrates: Restriction of carbohydrate intake to less than 40 g/day in the first 2 months (induction phase), and thereafter a gradual increase up to 70 g/day, and increased protein and fat intake. This diet was rich in vegetables and legumes and low in red meat, with poultry and fish replacing beef and lamb. Also, participants consumed provided 28 g of walnuts/day (16…		Half of the participants in each diet condition had also a physical activity intervention starting from month 6	Epigenetic age methylation based on a 240-CpGs formula		N	Paired-sample t-test	Change in methylation age did not differ significantly across intervention groups. In both cases, it increased slightly (0.9 years in the Mediterranean diet, 1.3 years in the low fat diet) Of note, across both diets, participants who achieved a successful weight loss had lower increase in methylation age (0.6 years) compared to participants who did not achieve weight loss (1.1 years)
Zhu H, Bhagatwala J, Huang Y, Pollock NK, Parikh S, Raed A, Gutin B, Harshfield GA, Dong Y. Race/Ethnicity-Specific Association of Vitamin D and Global DNA Methylation: Cross-Sectional and Interventional Findings. PLoS One. 2016 Apr 6;11(4):e0152849.	To assess the relationship between vitamin D and methylation changes in African-American students with suboptimal levels of vitamin D	Randomized clinical trial with four conditions: placebo, and 3 groups of vitamin D intervention: 600 IU/d, 2000 lU/d, 4000 lU/d	N	Y	Y	Placebo	Georgia, US	16 weeks	51	26	84		Vitamin D supplementation		Global %5-mC methylation	Blood	Y	Repeated-measures mixed models	The 16-week of vitamin D2 supplementation increased global %5-mC methylation in a dose-dependent manner (placebo < 600 IU/d < 2000 IU/d < 4000 IU/d)
